# Supplementary material
Source: MDPI journal article supplement (https://www.mdpi.com/2072-4292/14/14/3470)
Supplement: s1 [file s1 › remotesensing-1757942-supplementary.pdf]

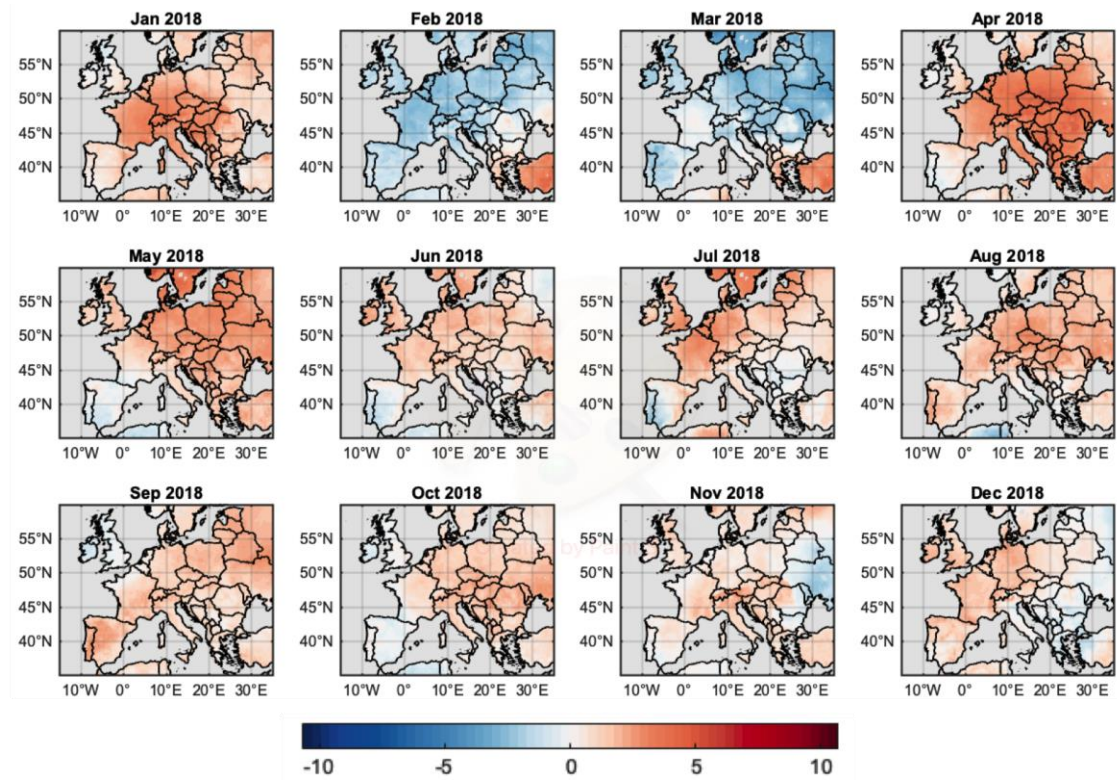

**Figure S1.** Monthly anomaly values of T2m from ERA5 during 2018 over Europe, with respect to 1979–2019.

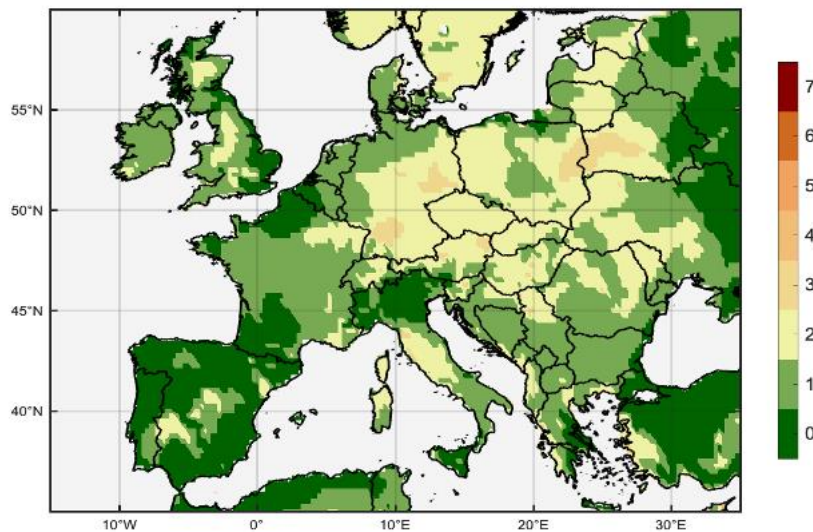

**Figure S2.** Spatial patterns of the number of months in 2018 which recorded the highest monthly T2m anomaly value from ERA5 regarding the 1979 to 2019 period.

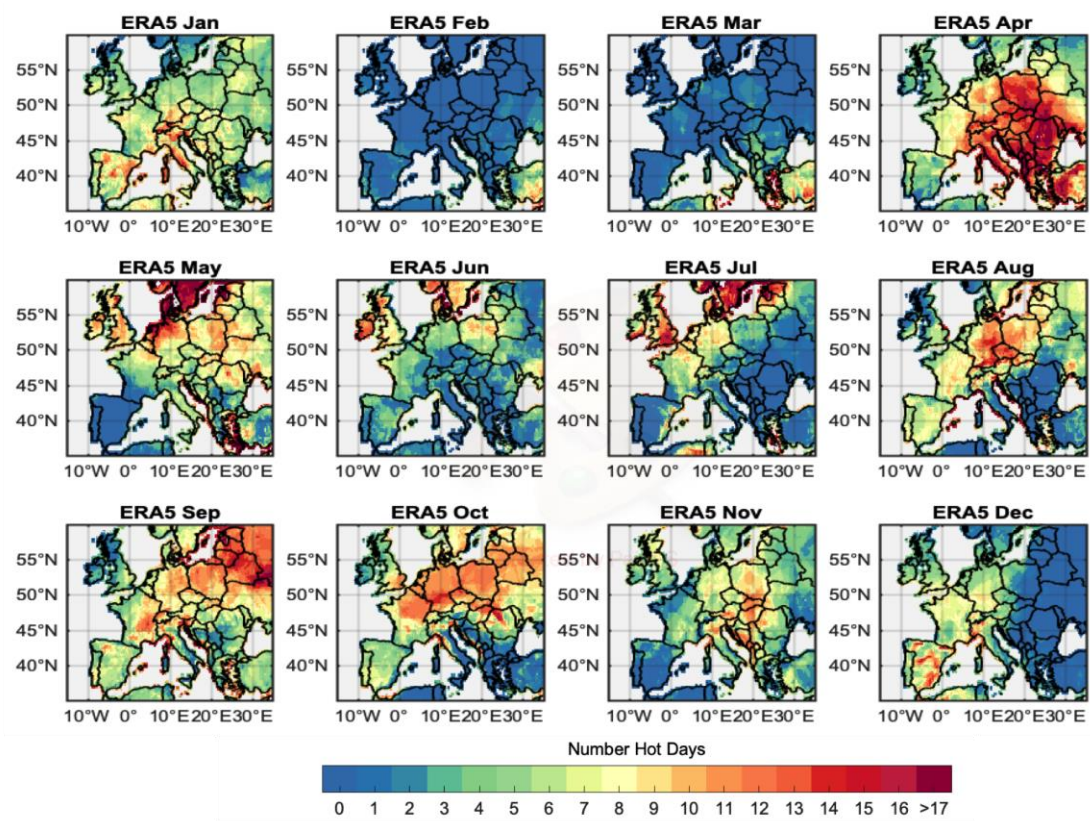

**Figure S3.** Monthly number of hot days (NHD) obtained from T2m ERA5 during 2018 over Europe, with respect to the period from 1979–2019.
